# Supplementary material for: Mapping Above-Ground Carbon Stocks at the Landscape Scale to Support a Carbon Compensation Mechanism: The Chocó Andino Case Study
Source: MDPI journal article supplement (doi:10.3390/f14091903), 2023-09-19
Supplement: s1 [file s1]

## ***FORESTS***

### **SUPPORTING INFORMATION**

#### **Mapping Above Ground Carbon stocks at the landscape scale to support a carbon compensation mechanism: The Chocó Andino case study**

#### **TABLES**

Table S1. Description of satellite bands used to build the Chocó Andino Biosphere Reserve AGC model.

| <b>Satellite</b>                             | <b>Bands</b>             | <b>Resolution</b> |
|----------------------------------------------|--------------------------|-------------------|
| <b>Sentinel 2B</b>                           |                          |                   |
|                                              | B2 – Blue                | 10                |
|                                              | B3 – Green               | 10                |
|                                              | B4 – Red                 | 10                |
|                                              | B5 – Vegetation red edge | 20                |
|                                              | B6 - Vegetation red edge | 20                |
|                                              | B7 - Vegetation red edge | 20                |
|                                              | B8 - NIR                 | 10                |
|                                              | B11 – SWIR 1             | 20                |
|                                              | B12 – SWIR 2             | 20                |
| <b>Sentinel 2B / spectral indices</b>        |                          |                   |
| Enhanced Vegetation Index 2                  | Evi2                     |                   |
| Bare Soil Index                              | bsi                      |                   |
| Soil Adjusted Total Vegetation Index         | satvi                    |                   |
| Green Normalized Difference Vegetation Index | gndvi                    |                   |
| Green and Red ratio Vegetation Index         | grvi                     |                   |

| Satellite                                                            | Bands | Resolution |
|----------------------------------------------------------------------|-------|------------|
| Inverted Red Edge Chlorophyll Index                                  | ireci |            |
| Normalized difference index 4 and 5                                  | Ndi45 |            |
| Normal deviation indices                                             | Ndre1 |            |
| <b>Sentinel 1</b>                                                    |       |            |
| Single co-polarization, vertical transmit/vertical receive           | VV    | 10         |
| Dual-band cross-polarization, vertical transmit / horizontal receive | VH    | 10         |
| Cross-ratio                                                          | VV/VH |            |

Table S2. Variable relative importance of the Random Forest model performed to predict AGC in the RBCA for the reference year 2019. Number of Trees: 1000

| Variable  | Relative importance (%) |
|-----------|-------------------------|
| Elevation | 18.62                   |
| Longitude | 14.08                   |
| Latitude  | 9.13                    |
| S2_NDRE1  | 6.01                    |
| S2_GRVI   | 4.38                    |
| S2_bsi    | 4.3                     |
| S1_CR     | 4.13                    |
| S2_GNDVI  | 3.78                    |
| S2_B2     | 3.51                    |
| S1_VH     | 3.4                     |
| S2_NDI45  | 3.27                    |
| S2_IRECI  | 3.14                    |

| <b>Variable</b> | <b>Relative importance<br/>(%)</b> |
|-----------------|------------------------------------|
| S2_B5           | 2.91                               |
| S1_VV           | 2.52                               |
| S2_satvi        | 2.35                               |
| S2_B12          | 2.17                               |
| S2_B11          | 1.96                               |
| S2_B3           | 1.93                               |
| s2_b7           | 1.85                               |
| S2_B4           | 1.74                               |
| s2_B6           | 1.68                               |
| S2_EVI2         | 1.66                               |
| s2_B8           | 1.49                               |

Table S3. Pixels that increase and decrease in Above Ground Carbon for the period 2018-2021 in the Chocó Andino Biosphere Reserve.

|      | <b>AGC productivity (AGC Mg C ha<sup>-1</sup>)</b> |                        |
|------|----------------------------------------------------|------------------------|
|      | <b>increase pixels</b>                             | <b>decrease pixels</b> |
| Rang | 0.01 - 8.7                                         | -9.5 - -0.01           |
| Mean | 0.60                                               | -0.48                  |
| ± Sd | 0.66                                               | 0.61                   |
| Sum  | 58,548                                             | -34,469                |

## FIGURES

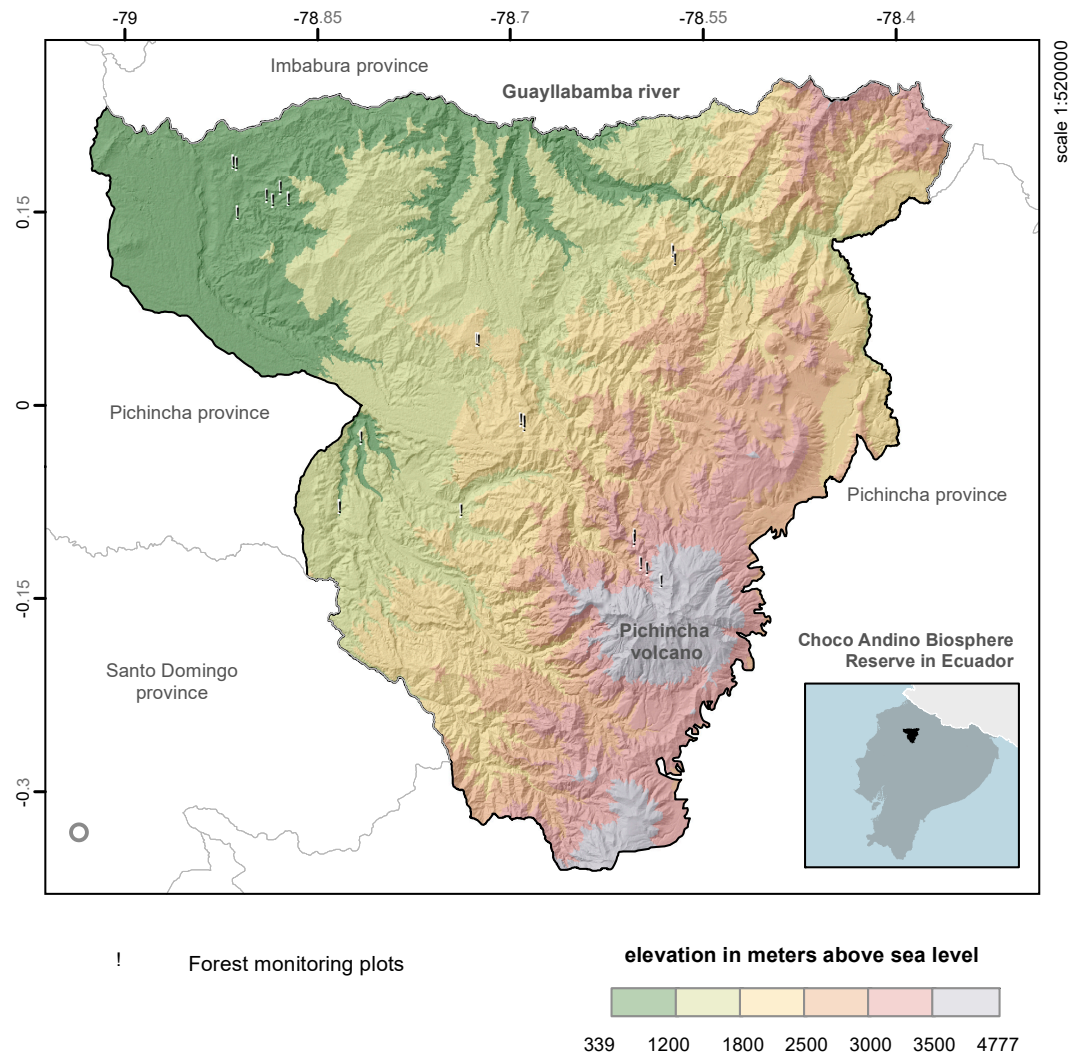

Figure S1. Location of the 23 permanent plots across an elevation gradient on the Choco Andino Biosphere Reserve (RBCA for its Spanish acronym).



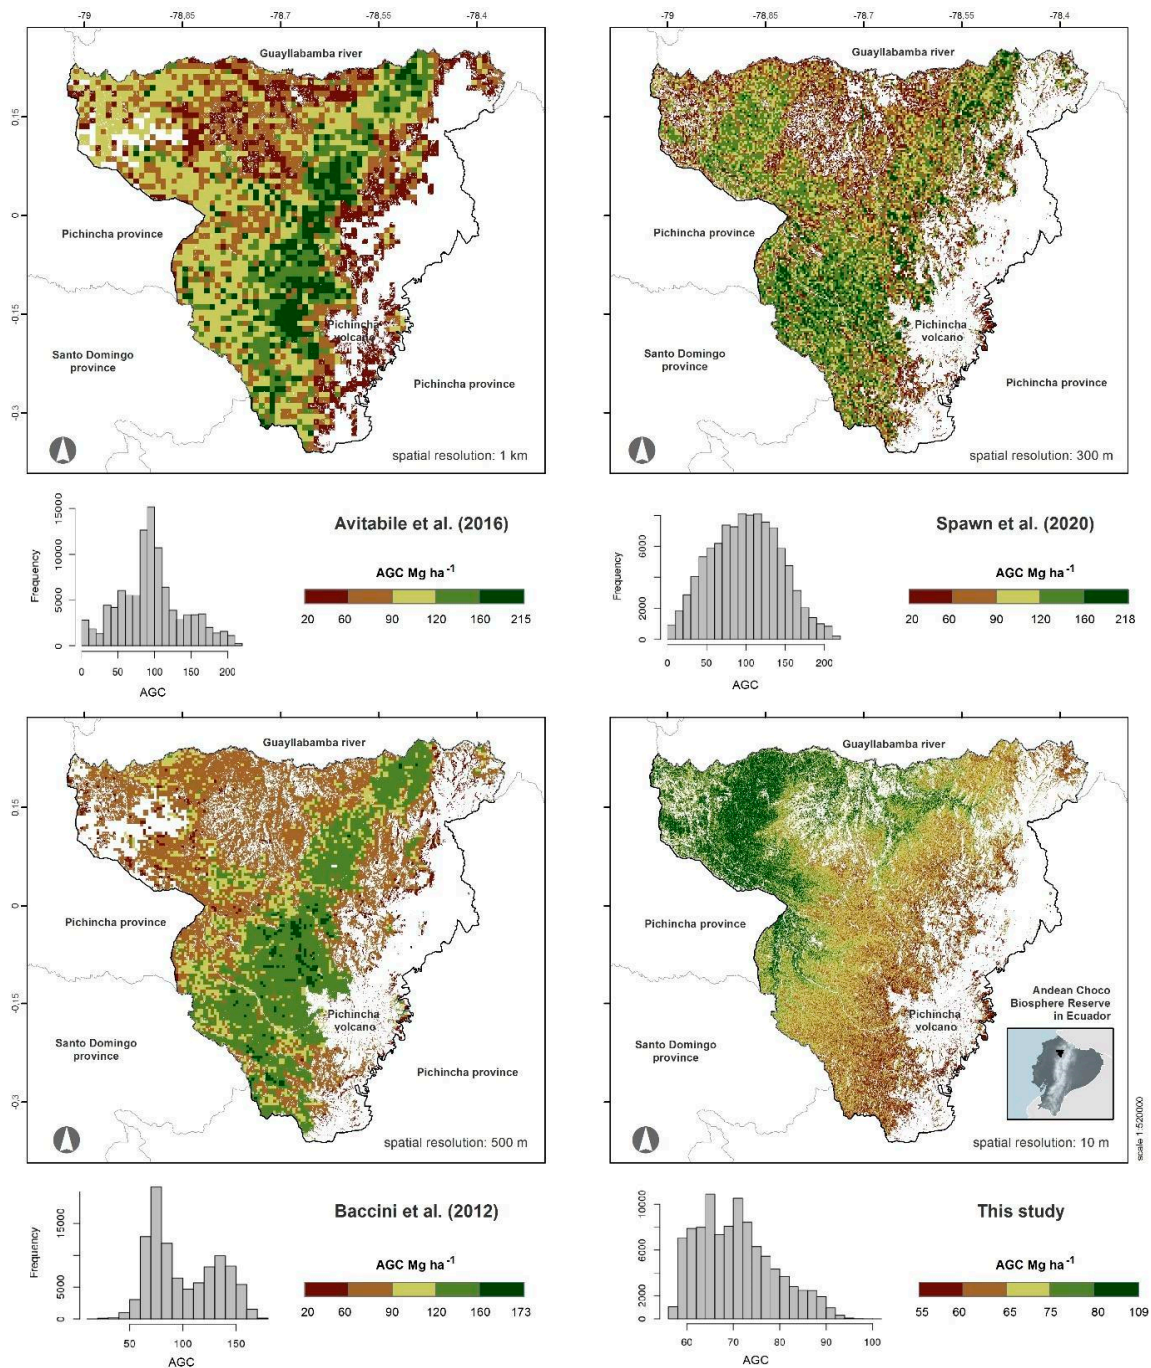

Figure S3. AGC stock estimates by four different models. Maps A-C correspond to global carbon models for the tropics at different spatial resolutions.



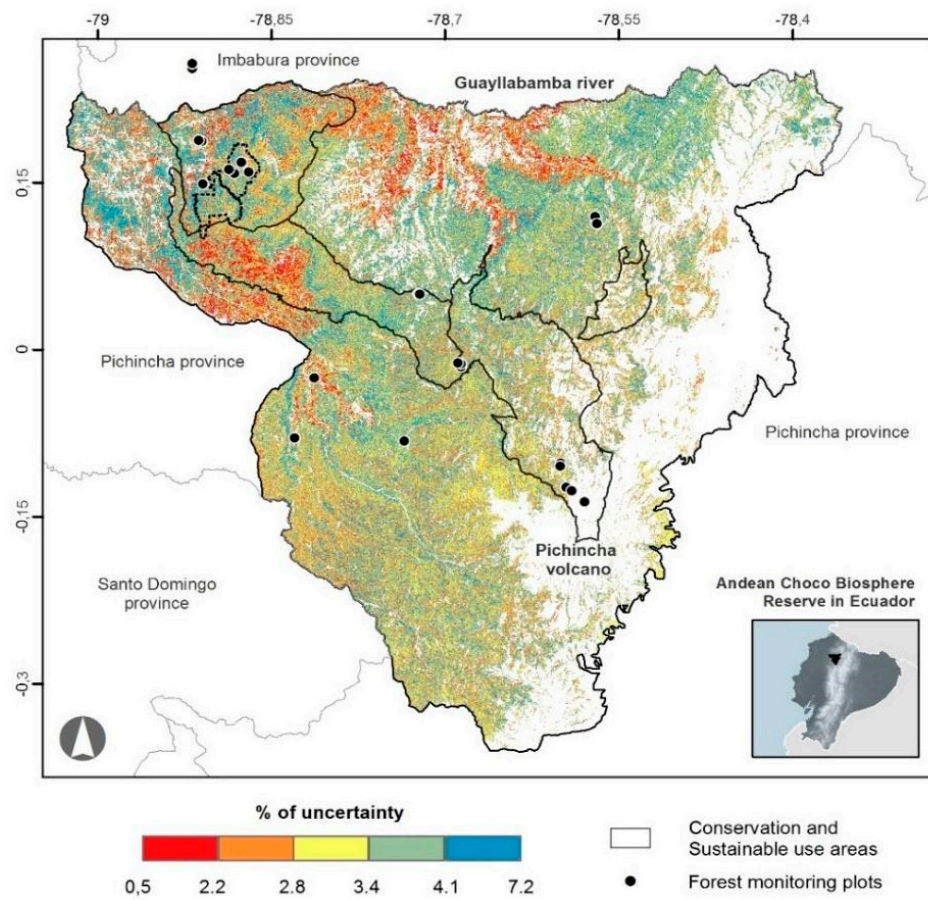

Figure S4. Variation in AGC uncertainty at pixel scale based on the coefficient of variation of 10 random forest models. White areas within the RBCA represent no-forest cover (i.e., pixels with less than 70% of forest cover, based on [49] for the year 2021). Polygons inside de RBCA delimit Quito municipality conservation and sustainable use areas (ACUs for its Spanish acronym).
