# Supplementary material for: Mapping Above-Ground Carbon Stocks at the Landscape Scale to Support a Carbon Compensation Mechanism: The Chocó Andino Case Study
Source: MDPI journal article supplement (doi:10.3390/f14091903), 2023-09-19
Supplement: s1 [file s1]

Archive with 1 entries (1 files):
- forests-2459438_Supplementary.pdf
